# Supplementary material
Source: HighWire-hosted journal article supplement (https://www.jrheum.org/highwire/filestream/42752/field_highwire_adjunct_files/0/211302DataSuppl.pdf)
Supplement: 211302DataSuppl.pdf [file 211302DataSuppl.pdf]

Supplementary Table S1. Descriptive analyses showing patient reported EQ-5D-5L utility score, HAQ-DI, WPAI and PsAID12 scores according to physician-reported patient flare status

|                                                                                                                                                                                                                                                                                                                                                                                                                                                                                                                                                        | Overall<br>(n=2,238) | Currently in flare*<br>(n=168) | Not currently<br>flaring, but flared<br>in last 12<br>months* (n=492) | Not flared ever/in<br>last 12 months*<br>(n=1,578) | P-value |
|--------------------------------------------------------------------------------------------------------------------------------------------------------------------------------------------------------------------------------------------------------------------------------------------------------------------------------------------------------------------------------------------------------------------------------------------------------------------------------------------------------------------------------------------------------|----------------------|--------------------------------|-----------------------------------------------------------------------|----------------------------------------------------|---------|
| EQ-5D-5L utility score, n                                                                                                                                                                                                                                                                                                                                                                                                                                                                                                                              | 934                  | 69                             | 194                                                                   | 671                                                |         |
| Mean (SD)                                                                                                                                                                                                                                                                                                                                                                                                                                                                                                                                              | 0.81 (0.18)          | 0.59 (0.23)                    | 0.78 (0.18)                                                           | 0.84 (0.15)                                        | <0.001  |
| HAQ-DI, n,                                                                                                                                                                                                                                                                                                                                                                                                                                                                                                                                             | n=92                 | n=67                           | n=187                                                                 | n=648                                              | <0.001  |
| mean (SD)                                                                                                                                                                                                                                                                                                                                                                                                                                                                                                                                              | 0.5 (0.6)            | 1.1 (0.6)                      | 0.6 (0.6)                                                             | 0.5 (0.5)                                          |         |
| WPAI Work time missed, n                                                                                                                                                                                                                                                                                                                                                                                                                                                                                                                               | n=507                | n=35                           | n=102                                                                 | n=370                                              |         |
| Work time missed, mean percentage (SD)                                                                                                                                                                                                                                                                                                                                                                                                                                                                                                                 | 5.1 (17.3)           | 13.6 (24.1)                    | 3.8 (14.0)                                                            | 4.7 (17.2)                                         | 0.009   |
| Impairment while working, n                                                                                                                                                                                                                                                                                                                                                                                                                                                                                                                            | n=560                | n=36                           | n=112                                                                 | n=412                                              |         |
| Impairment while working, mean percentage (SD)                                                                                                                                                                                                                                                                                                                                                                                                                                                                                                         | 19.0 (17.2)          | 45.6 (23.7)                    | 23.6 (17.6)                                                           | 15.4 (13.8)                                        | <0.001  |
| Overall work impairment, n                                                                                                                                                                                                                                                                                                                                                                                                                                                                                                                             | n=496                | n=34                           | n=101                                                                 | n=361                                              |         |
| Overall work impairment, mean percentage (SD)                                                                                                                                                                                                                                                                                                                                                                                                                                                                                                          | 22.0 (19.3)          | 48.3 (25.6)                    | 25.7 (19.1)                                                           | 18.5 (16.3)                                        | <0.001  |
| Activity impairment, n                                                                                                                                                                                                                                                                                                                                                                                                                                                                                                                                 | n=925                | n=70                           | n=199                                                                 | n=656                                              |         |
| Activity impairment, mean percentage (SD)                                                                                                                                                                                                                                                                                                                                                                                                                                                                                                              | 26.2 (22.4)          | 53.4 (25.0)                    | 32.1 (22.4)                                                           | 21.5 (19.4)                                        | <0.001  |
| PsAID12, n (SD)                                                                                                                                                                                                                                                                                                                                                                                                                                                                                                                                        | n=923                | n=67                           | n=195                                                                 | n=662                                              |         |
| Overall score (0-10)                                                                                                                                                                                                                                                                                                                                                                                                                                                                                                                                   | 2.5 (2.0)            | 5.0 (2.2)                      | 3.2(2.0)                                                              | 2.0 (1.7)                                          | <0.001  |
| Pain (0-10)                                                                                                                                                                                                                                                                                                                                                                                                                                                                                                                                            | 2.7 (2.3)            | 5.6 (2.4)                      | 3.5 (2.2)                                                             | 2.2 (2.10)                                         | <0.001  |
| Fatigue (0-10)                                                                                                                                                                                                                                                                                                                                                                                                                                                                                                                                         | 2.9 (2.5)            | 5.7 (2.7)                      | 3.8 (2.5)                                                             | 2.3 (2.2)                                          | <0.001  |
| Skin problem (0-10)                                                                                                                                                                                                                                                                                                                                                                                                                                                                                                                                    | 2.5 (2.3)            | 4.2 (3.1)                      | 3.0 (2.1)                                                             | 2.2 (2.1)                                          | <0.001  |
| Work/leisure activities (0-10)                                                                                                                                                                                                                                                                                                                                                                                                                                                                                                                         | 2.4 (2.3)            | 5.1 (2.7)                      | 3.2 (2.3)                                                             | 2.0 (2.0)                                          | <0.001  |
| Functional capacity (0-10)                                                                                                                                                                                                                                                                                                                                                                                                                                                                                                                             | 2.5 (2.3)            | 5.2 (2.5)                      | 3.2 (2.4)                                                             | 1.9 (2.0)                                          | <0.001  |
| Discomfort (0-10)                                                                                                                                                                                                                                                                                                                                                                                                                                                                                                                                      | 2.7 (2.5)            | 5.7 (2.7)                      | 3.7 (2.6)                                                             | 2.1 (2.1)                                          | <0.001  |
| Sleep disturbance (0-10)                                                                                                                                                                                                                                                                                                                                                                                                                                                                                                                               | 2.4 (2.5)            | 5.2 (2.8)                      | 3.3 (2.6)                                                             | 1.9 (2.2)                                          | <0.001  |
| Coping (0-10)                                                                                                                                                                                                                                                                                                                                                                                                                                                                                                                                          | 2.2 (2.3)            | 4.4 (2.7)                      | 2.9 (2.5)                                                             | 1.8 (2.0)                                          | <0.001  |
| Anxiety, fear and uncertainty (0-10)                                                                                                                                                                                                                                                                                                                                                                                                                                                                                                                   | 2.3 (2.5)            | 4.6 (2.8)                      | 3.0 (2.8)                                                             | 1.8 (2.1)                                          | <0.001  |
| Embarrassment and/or shame (0-10)                                                                                                                                                                                                                                                                                                                                                                                                                                                                                                                      | 2.1 (2.5)            | 4.3 (2.9)                      | 2.8 (2.7)                                                             | 1.7 (2.2)                                          | <0.001  |
| Social participation (0-10)                                                                                                                                                                                                                                                                                                                                                                                                                                                                                                                            | 2.0 (2.4)            | 2.2 (3.0)                      | 2.8 (2.5)                                                             | 1.6 (2.0)                                          | <0.001  |
| Depression (0-10)                                                                                                                                                                                                                                                                                                                                                                                                                                                                                                                                      | 1.9 (2.4)            | 3.7 (3.1)                      | 2.6 (2.7)                                                             | 1.5 (2.1)                                          | <0.001  |
| *Flare status reported by physician<br>Values in bold are significant at p<0.05<br>EQ-5D-5L=EuroQol 5-dimension 5-level questionnaire; HAQ-DI=Health Assessment Questionnaire-Disease Index; PsAID12=Psoriatic Arthritis Impact of Disease 12-item questionnaire; SD=standard deviation; WPAI=Work Productivity and Activity Impairment questionnaire<br>Patients were compared, using parametric or non-parametric tests as appropriate (ANOVA for numeric variables, Kruskal-Wallis test for ordinal variables, Chi2 test for categorical variables. |                      |                                |                                                                       |                                                    |         |

Supplementary Table S2. Descriptive analyses showing demographic and clinical characteristics by patient-reported flare status ("Do you ever experience 'flares' (temporary worsening) of your PsA?")

|                                       | Overall (n=947) | "Yes, I am currently experiencing a flare" (n=95) | "Yes, but I am not currently experiencing a flare" (n=376) | "No, I do not flare" (n=476) | P-value |
|---------------------------------------|-----------------|---------------------------------------------------|------------------------------------------------------------|------------------------------|---------|
| Age, years; mean (SD)                 | 47.8 (13.5)     | 52.0 (12.7)                                       | 48.9 (13.0)                                                | 46.1 (13.8)                  | <0.001  |
| Age group (%)                         | n=947           | n=95                                              | n=376                                                      | n=476                        |         |
| 18-29                                 | 8.0             | 2.1                                               | 7.7                                                        | 9.5                          | <0.001  |
| 30-39                                 | 22.3            | 15.8                                              | 18.6                                                       | 26.5                         |         |
| 40-49                                 | 24.9            | 25.3                                              | 23.7                                                       | 25.8                         |         |
| 50-59                                 | 23.7            | 25.3                                              | 28.2                                                       | 19.7                         |         |
| 60-69                                 | 15.3            | 24.2                                              | 16.8                                                       | 12.4                         |         |
| 70-79                                 | 4.8             | 6.3                                               | 3.7                                                        | 5.3                          |         |
| 80+                                   | 1.1             | 1.1                                               | 1.3                                                        | 0.8                          |         |
| Male (%)                              | 53.9            | 45.3                                              | 54.0                                                       | 55.5                         | 0.190   |
| White/Caucasian (%)                   | 92.4            | 92.6                                              | 92.8                                                       | 92.0                         | 0.483   |
| BMI; mean (SD)                        | 26.7 (4.8)      | 27.7 (4.7)                                        | 26.9 (5.3)                                                 | 26.3 (4.2)                   | 0.019   |
| Current smoker (%)                    | 19.5            | 17.5                                              | 20.3                                                       | 19.3                         | 0.246   |
| Employment, (%)                       | n=923           | n=91                                              | n=366                                                      | n=466                        |         |
| Full-time                             | 59.6            | 40.7                                              | 59.6                                                       | 63.3                         | <0.001  |
| Part-time                             | 8.1             | 11.0                                              | 7.1                                                        | 8.4                          |         |
| Long-term sick leave                  | 2.4             | 5.5                                               | 3.3                                                        | 3.3                          |         |
| Homemaker                             | 8.1             | 14.3                                              | 6.3                                                        | 6.3                          |         |
| Student                               | 2.4             | 0.0                                               | 2.2                                                        | 2.2                          |         |
| Unemployed                            | 5.0             | 11.0                                              | 5.5                                                        | 5.5                          |         |
| Retired                               | 14.4            | 17.6                                              | 16.1                                                       | 16.1                         |         |
| Time since onset of symptoms (months) | n=569           | n=58                                              | n=251                                                      | n=260                        |         |
| Mean (SD)                             | 83.3 (94.4)     | 126.8 (109.8)                                     | 99.5 (101.4)                                               | 58.1 (75.2)                  | <0.001  |
| Time since diagnosis (months)         | n=770           | n=75                                              | n=307                                                      | n=388                        |         |
| Mean (SD)                             | 62.3 (77.9)     | 90.3 (103.8)                                      | 76.2 (85.8)                                                | 46.0 (60.0)                  | <0.001  |
| Current disease severity (%)          | n=947           | n=95                                              | n=376                                                      | n=476                        |         |
| Mild                                  | 72.4            | 40.0                                              | 68.1                                                       | 82.4                         | <0.001  |
| Moderate                              | 25.1            | 50.5                                              | 29.8                                                       | 16.4                         |         |
| Severe                                | 2.4             | 9.5                                               | 2.1                                                        | 1.3                          |         |

\*Flare status reported by patient. BMI=Body Mass Index (kg/m<sup>2</sup>); SD=standard deviation

Values in bold are significant at p<0.05

Patients were compared, using parametric or non-parametric tests as appropriate (ANOVA for numeric variables, Kruskal-Wallis test for ordinal variables, Chi<sup>2</sup> test for categorical variables).

Supplementary Table S3. Descriptive analyses showing PsA symptoms by patient-reported flare status (“Do you ever experience ‘flares’ (temporary worsening) of your PsA?”)

|                                                                                                                                                                                                                                                                                                                                                                                                      | Overall (n=947) | “Yes, I am currently experiencing a flare” (n=95) | “Yes, but I am not currently experiencing a flare” (n=376) | “No, I do not flare” (n=476) | P-value |
|------------------------------------------------------------------------------------------------------------------------------------------------------------------------------------------------------------------------------------------------------------------------------------------------------------------------------------------------------------------------------------------------------|-----------------|---------------------------------------------------|------------------------------------------------------------|------------------------------|---------|
| Current symptoms (%)                                                                                                                                                                                                                                                                                                                                                                                 | n=947           | n=95                                              | n=376                                                      | n=476                        |         |
| Tender joints                                                                                                                                                                                                                                                                                                                                                                                        | 53.0            | 80.0                                              | 53.7                                                       | 47.1                         | <0.001  |
| Swollen joints                                                                                                                                                                                                                                                                                                                                                                                       | 28.7            | 54.7                                              | 27.4                                                       | 24.6                         | <0.001  |
| Psoriatic skin lesions                                                                                                                                                                                                                                                                                                                                                                               | 52.7            | 61.1                                              | 55.9                                                       | 48.5                         | 0.024   |
| Genital psoriasis                                                                                                                                                                                                                                                                                                                                                                                    | 2.9             | 6.3                                               | 2.1                                                        | 2.7                          | 0.088   |
| Palmoplantar pustulosis                                                                                                                                                                                                                                                                                                                                                                              | 2.2             | 5.3                                               | 2.7                                                        | 1.3                          | 0.041   |
| Palms/soles                                                                                                                                                                                                                                                                                                                                                                                          | 8.9             | 12.6                                              | 9.8                                                        | 7.4                          | 0.178   |
| Nail deformation                                                                                                                                                                                                                                                                                                                                                                                     | 19.9            | 25.3                                              | 26.1                                                       | 13.9                         | <0.001  |
| Dactylitis                                                                                                                                                                                                                                                                                                                                                                                           | 7.0             | 15.8                                              | 8.0                                                        | 4.4                          | <0.001  |
| Enthesitis                                                                                                                                                                                                                                                                                                                                                                                           | 6.0             | 20.0                                              | 7.4                                                        | 2.1                          | <0.001  |
| Tendonitis                                                                                                                                                                                                                                                                                                                                                                                           | 3.5             | 9.5                                               | 2.9                                                        | 2.7                          | 0.004   |
| IBP                                                                                                                                                                                                                                                                                                                                                                                                  | 12.5            | 16.8                                              | 17.0                                                       | 8.0                          | <0.001  |
| Sacroiliitis                                                                                                                                                                                                                                                                                                                                                                                         | 3.1             | 5.3                                               | 4.3                                                        | 1.7                          | 0.041   |
| Uveitis/iritis                                                                                                                                                                                                                                                                                                                                                                                       | 1.0             | 0.0                                               | 1.3                                                        | 0.8                          | 0.461   |
| IBD                                                                                                                                                                                                                                                                                                                                                                                                  | 1.7             | 3.2                                               | 2.7                                                        | 0.6                          | 0.037   |
| % BSA, n                                                                                                                                                                                                                                                                                                                                                                                             | n=728           | n=73                                              | n=305                                                      | n=350                        |         |
| % BSA affected, mean (SD)                                                                                                                                                                                                                                                                                                                                                                            | 6.2 (8.4)       | 8.1 (11.0)                                        | 6.6 (8.7)                                                  | 5.4 (7.3)                    | 0.022   |
| 66 Swollen joint count, n                                                                                                                                                                                                                                                                                                                                                                            | n=233           | n=32                                              | n=106                                                      | n=95                         |         |
| 66 Swollen joint count, mean (SD)                                                                                                                                                                                                                                                                                                                                                                    | 3.0 (5.9)       | 4.1 (4.4)                                         | 2.7 (4.2)                                                  | 3.0 (7.8)                    | 0.511   |
| 68 Tender joint count, n                                                                                                                                                                                                                                                                                                                                                                             | n=223           | n=35                                              | n=101                                                      | n=87                         |         |
| 68 Tender joint count, mean (SD)                                                                                                                                                                                                                                                                                                                                                                     | 4.0 (5.4)       | 6.5 (4.9)                                         | 4.3 (5.9)                                                  | 2.7 (4.7)                    | 0.002   |
| *Flare status reported by patient. BSA=body surface area; IBD=inflammatory bowel disease; IBP=inflammatory back pain; SD=standard deviation<br>Patients were compared, using parametric or non-parametric tests as appropriate (ANOVA for numeric variables, Kruskal-Wallis test for ordinal variables, Chi <sup>2</sup> test for categorical variables.<br>Values in bold are significant at p<0.05 |                 |                                                   |                                                            |                              |         |

Supplementary Table S4. Descriptive analyses showing patient current treatment for PsA by patient-reported flare status ("Do you ever experience 'flares' (temporary worsening) of your PsA?")

|                                                                                                                                                                                                                                                                                                                                                                                                           | Overall (n=947) | "Yes, I am currently experiencing a flare" (n=95) | "Yes, but I am not currently experiencing a flare" (n=376) | "No, I do not flare" (n=476) | P-value |
|-----------------------------------------------------------------------------------------------------------------------------------------------------------------------------------------------------------------------------------------------------------------------------------------------------------------------------------------------------------------------------------------------------------|-----------------|---------------------------------------------------|------------------------------------------------------------|------------------------------|---------|
| <b>Current treatment (%)</b>                                                                                                                                                                                                                                                                                                                                                                              | <b>n=947</b>    | <b>n=95</b>                                       | <b>n=376</b>                                               | <b>n=476</b>                 |         |
| NSAID                                                                                                                                                                                                                                                                                                                                                                                                     | 24.6            | 34.7                                              | 25.8                                                       | 21.6                         | 0.020   |
| Non-opioid analgesic                                                                                                                                                                                                                                                                                                                                                                                      | 5.9             | 12.6                                              | 8.8                                                        | 2.3                          | <0.001  |
| Opioid analgesic                                                                                                                                                                                                                                                                                                                                                                                          | 2.7             | 7.4                                               | 2.7                                                        | 1.9                          | 0.012   |
| Oral steroid                                                                                                                                                                                                                                                                                                                                                                                              | 5.0             | 12.6                                              | 5.1                                                        | 3.4                          | <0.001  |
| Injected steroid                                                                                                                                                                                                                                                                                                                                                                                          | 2.2             | 3.2                                               | 2.4                                                        | 1.9                          | 0.713   |
| Topical steroid                                                                                                                                                                                                                                                                                                                                                                                           | 16.9            | 18.9                                              | 18.9                                                       | 14.9                         | 0.263   |
| Topical non-steroid                                                                                                                                                                                                                                                                                                                                                                                       | 8.7             | 7.4                                               | 8.8                                                        | 8.8                          | 0.895   |
| Phototherapy                                                                                                                                                                                                                                                                                                                                                                                              | 3.5             | 2.1                                               | 6.1                                                        | 1.7                          | 0.002   |
| Oral retinoid                                                                                                                                                                                                                                                                                                                                                                                             | 1.0             | 1.1                                               | 1.1                                                        | 0.8                          | 0.940   |
| Fumarate                                                                                                                                                                                                                                                                                                                                                                                                  | 0.6             | 0.0                                               | 0.0                                                        | 1.3                          | 0.050   |
| Conventional synthetic DMARD                                                                                                                                                                                                                                                                                                                                                                              | 38.9            | 54.7                                              | 42.8                                                       | 32.6                         | <0.001  |
| Targeted synthetic DMARD                                                                                                                                                                                                                                                                                                                                                                                  | 13.5            | 16.8                                              | 12.2                                                       | 13.9                         | 0.478   |
| Biologic DMARD (original or biosimilar)                                                                                                                                                                                                                                                                                                                                                                   | 48.6            | 50.5                                              | 54.8                                                       | 43.3                         | 0.004   |
| <b>Time since first advanced therapy (months)</b>                                                                                                                                                                                                                                                                                                                                                         | <b>n=531</b>    | <b>n=62</b>                                       | <b>n=229</b>                                               | <b>n=240</b>                 |         |
| Mean (SD)                                                                                                                                                                                                                                                                                                                                                                                                 | 34.5 (41.2)     | 40.9 (48.0)                                       | 38.4 (45.0)                                                | 29.0 (34.5)                  | 0.020   |
| <b>Current treatment regimen (%)</b>                                                                                                                                                                                                                                                                                                                                                                      | <b>n=936</b>    | <b>n=95</b>                                       | <b>n=375</b>                                               | <b>n=466</b>                 |         |
| Monotherapy                                                                                                                                                                                                                                                                                                                                                                                               | 51.7            | 37.9                                              | 41.9                                                       | 62.4                         | <0.001  |
| Combination                                                                                                                                                                                                                                                                                                                                                                                               | 48.3            | 62.1                                              | 58.1                                                       | 37.6                         |         |
| *Flare status reported by patient. DMARD=disease modifying antirheumatic drug; NSAID=non-steroidal anti-inflammatory drug; SD=standard deviation<br>Patients were compared, using parametric or non-parametric tests as appropriate (ANOVA for numeric variables, Kruskal-Wallis test for ordinal variables, Chi <sup>2</sup> test for categorical variables.<br>Values in bold are significant at p<0.05 |                 |                                                   |                                                            |                              |         |

Supplementary Table S5: Adjusted logistic regression analyses showing the impact of patient-reported flare status on PRO scores as reported by patients.

|                                                                                                                                                                                                                                                                                                                                                                                                                                                                                                                                   | Current flare status                               | Change in predicted PRO values | P-value (vs. reference group) |
|-----------------------------------------------------------------------------------------------------------------------------------------------------------------------------------------------------------------------------------------------------------------------------------------------------------------------------------------------------------------------------------------------------------------------------------------------------------------------------------------------------------------------------------|----------------------------------------------------|--------------------------------|-------------------------------|
| EQ-5D-5L utility (n=590)                                                                                                                                                                                                                                                                                                                                                                                                                                                                                                          | "No, I do not flare"                               | Reference group                |                               |
|                                                                                                                                                                                                                                                                                                                                                                                                                                                                                                                                   | "Yes, I am currently experiencing a flare"         | -0.21                          | <0.001                        |
|                                                                                                                                                                                                                                                                                                                                                                                                                                                                                                                                   | "Yes, but I am not currently experiencing a flare" | -0.07                          | <0.001                        |
| EQ-5D-VAS (n=598)                                                                                                                                                                                                                                                                                                                                                                                                                                                                                                                 | "No, I do not flare"                               | Reference group                |                               |
|                                                                                                                                                                                                                                                                                                                                                                                                                                                                                                                                   | "Yes, I am currently experiencing a flare"         | -21.4                          | <0.001                        |
|                                                                                                                                                                                                                                                                                                                                                                                                                                                                                                                                   | "Yes, but I am not currently experiencing a flare" | -4.3                           | <0.001                        |
| WPAI % overall work impairment (n=331)                                                                                                                                                                                                                                                                                                                                                                                                                                                                                            | "No, I do not flare"                               | Reference group                |                               |
|                                                                                                                                                                                                                                                                                                                                                                                                                                                                                                                                   | "Yes, I am currently experiencing a flare"         | +26.6                          | <0.001                        |
|                                                                                                                                                                                                                                                                                                                                                                                                                                                                                                                                   | "Yes, but I am not currently experiencing a flare" | +0.9                           | 0.635                         |
| HAQ-DI (n=573)                                                                                                                                                                                                                                                                                                                                                                                                                                                                                                                    | "No, I do not flare"                               | Reference group                |                               |
|                                                                                                                                                                                                                                                                                                                                                                                                                                                                                                                                   | "Yes, I am currently experiencing a flare"         | +0.5                           | <0.001                        |
|                                                                                                                                                                                                                                                                                                                                                                                                                                                                                                                                   | "Yes, but I am not currently experiencing a flare" | +0.2                           | <0.001                        |
| PsAID12 (n=585)                                                                                                                                                                                                                                                                                                                                                                                                                                                                                                                   | "No, I do not flare"                               | Reference group                |                               |
|                                                                                                                                                                                                                                                                                                                                                                                                                                                                                                                                   | "Yes, I am currently experiencing a flare"         | +3.4                           | <0.001                        |
|                                                                                                                                                                                                                                                                                                                                                                                                                                                                                                                                   | "Yes, but I am not currently experiencing a flare" | +0.6                           | <0.001                        |
| <p>PRO key for worse outcome (range): EQ-5D-5L utility (0-1.0)=lower; EQ-5D-VAS (0-100)=lower; WPAI (0-100)=higher; HAQ-DI (0-3)=higher; PsAID12 (0-10)=higher</p> <p>EQ-5D-5L=EuroQol 5-dimension 5-level questionnaire; HAQ-DI=Health Assessment Questionnaire-Disease Index; PRO=patient-reported outcome; PsAID12=Psoriatic Arthritis Impact of Disease 12-item questionnaire; VAS=Visual Analogue Scale; WPAI=Work Productivity and Activity Impairment questionnaire</p> <p>Values in bold are significant at p&lt;0.05</p> |                                                    |                                |                               |

Supplementary Table S6. Descriptive analyses showing EQ-5D-5L utility score HAQ-DI, WPAI and PsAID12 scores by patient-reported flare status

|                                                                                                                                                                                                                                                                                                                                                                                                                                                                                                                            | Overall<br>(n=947) | "Yes, I am<br>currently<br>experiencing a<br>flare" (n=95) | "Yes, but I am not<br>currently<br>experiencing a<br>flare" (n=376) | "No, I do not flare"<br>(n=476) | P-value |
|----------------------------------------------------------------------------------------------------------------------------------------------------------------------------------------------------------------------------------------------------------------------------------------------------------------------------------------------------------------------------------------------------------------------------------------------------------------------------------------------------------------------------|--------------------|------------------------------------------------------------|---------------------------------------------------------------------|---------------------------------|---------|
| EQ-5D-5L utility score, n                                                                                                                                                                                                                                                                                                                                                                                                                                                                                                  | 930                | 92                                                         | 369                                                                 | 469                             |         |
| Mean (SD)                                                                                                                                                                                                                                                                                                                                                                                                                                                                                                                  | 0.81 (0.18)        | 0.59 (0.23)                                                | 0.79 (0.17)                                                         | 0.87 (0.12)                     | <0.001  |
| HAQ-DI, n,                                                                                                                                                                                                                                                                                                                                                                                                                                                                                                                 | n=901              | n=86                                                       | n=353                                                               | n=462                           |         |
| mean (SD)                                                                                                                                                                                                                                                                                                                                                                                                                                                                                                                  | 0.5 (0.6)          | 1.1 (0.7)                                                  | 0.6 (0.6)                                                           | 0.3 (0.4)                       | <0.001  |
| WPAI Work time missed, n                                                                                                                                                                                                                                                                                                                                                                                                                                                                                                   | n=506              | n=38                                                       | n=209                                                               | n=259                           |         |
| Work time missed, mean percentage (SD)                                                                                                                                                                                                                                                                                                                                                                                                                                                                                     | 5.1 (17.3)         | 14.6 (24.6)                                                | 3.4 (13.0)                                                          | 5.1 (18.7)                      | 0.001   |
| WPAI Impairment while working, n                                                                                                                                                                                                                                                                                                                                                                                                                                                                                           | n=560              | n=42                                                       | n=223                                                               | n=295                           |         |
| Impairment while working, mean percentage (SD)                                                                                                                                                                                                                                                                                                                                                                                                                                                                             | 18.9 (17.0)        | 41.9 (24.0)                                                | 19.5 (16.2)                                                         | 15.1 (13.4)                     | <0.001  |
| WPAI Overall work impairment, n                                                                                                                                                                                                                                                                                                                                                                                                                                                                                            | n=495              | n=37                                                       | n=207                                                               | n=251                           |         |
| Overall work impairment, mean percentage (SD)                                                                                                                                                                                                                                                                                                                                                                                                                                                                              | 22.0 (19.1)        | 47.2 (25.4)                                                | 21.6 (17.7)                                                         | 18.5 (16.1)                     | <0.001  |
| WPAI Activity impairment, n                                                                                                                                                                                                                                                                                                                                                                                                                                                                                                | n=921              | n=89                                                       | n=371                                                               | n=461                           |         |
| Activity impairment, mean percentage (SD)                                                                                                                                                                                                                                                                                                                                                                                                                                                                                  | 25.8 (22.1)        | 54.2 (23.2)                                                | 27.7 (21.3)                                                         | 18.8 (17.3)                     | <0.001  |
| PsAID12, n (SD)                                                                                                                                                                                                                                                                                                                                                                                                                                                                                                            | n=907              | n=82                                                       | n=357                                                               | n=468                           |         |
| Overall score (0-10)                                                                                                                                                                                                                                                                                                                                                                                                                                                                                                       | 2.4 (2.0)          | 5.4 (2.0)                                                  | 2.7 (1.9)                                                           | 1.7 (1.5)                       | <0.001  |
| Pain (0-10)                                                                                                                                                                                                                                                                                                                                                                                                                                                                                                                | 2.7 (2.2)          | 6.0 (2.2)                                                  | 2.9 (2.1)                                                           | 2.0 (1.7)                       | <0.001  |
| Fatigue (0-10)                                                                                                                                                                                                                                                                                                                                                                                                                                                                                                             | 2.8 (2.5)          | 6.3 (2.5)                                                  | 3.2 (2.4)                                                           | 1.9 (1.8)                       | <0.001  |
| Skin problem (0-10)                                                                                                                                                                                                                                                                                                                                                                                                                                                                                                        | 2.5 (2.3)          | 4.8 (3.2)                                                  | 2.6 (2.0)                                                           | 2.0 (1.9)                       | <0.001  |
| Work/leisure activities (0-10)                                                                                                                                                                                                                                                                                                                                                                                                                                                                                             | 2.4 (2.3)          | 5.4 (2.5)                                                  | 2.6 (2.2)                                                           | 1.7 (1.7)                       | <0.001  |
| Functional capacity (0-10)                                                                                                                                                                                                                                                                                                                                                                                                                                                                                                 | 2.4 (2.3)          | 5.5 (2.6)                                                  | 2.7 (2.2)                                                           | 1.6 (1.7)                       | <0.001  |
| Discomfort (0-10)                                                                                                                                                                                                                                                                                                                                                                                                                                                                                                          | 2.7 (2.5)          | 6.4 (2.4)                                                  | 2.9 (2.3)                                                           | 1.8 (1.8)                       | <0.001  |
| Sleep disturbance (0-10)                                                                                                                                                                                                                                                                                                                                                                                                                                                                                                   | 2.4 (2.5)          | 5.6 (2.7)                                                  | 2.6 (2.4)                                                           | 1.6 (1.9)                       | <0.001  |
| Coping (0-10)                                                                                                                                                                                                                                                                                                                                                                                                                                                                                                              | 2.2 (2.3)          | 4.9 (2.6)                                                  | 2.4 (2.2)                                                           | 1.6 (1.8)                       | <0.001  |
| Anxiety, fear and uncertainty (0-10)                                                                                                                                                                                                                                                                                                                                                                                                                                                                                       | 2.2 (2.4)          | 4.9 (3.1)                                                  | 2.4 (2.4)                                                           | 1.6 (2.0)                       | <0.001  |
| Embarrassment and/or shame (0-10)                                                                                                                                                                                                                                                                                                                                                                                                                                                                                          | 2.1 (2.4)          | 4.5 (2.9)                                                  | 2.3 (2.5)                                                           | 1.5 (2.0)                       | <0.001  |
| Social participation (0-10)                                                                                                                                                                                                                                                                                                                                                                                                                                                                                                | 2.0 (2.3)          | 4.6 (3.0)                                                  | 2.3 (2.3)                                                           | 1.3 (1.8)                       | <0.001  |
| Depression (0-10)                                                                                                                                                                                                                                                                                                                                                                                                                                                                                                          | 1.8 (2.4)          | 4.1 (3.3)                                                  | 2.0 (2.4)                                                           | 1.3 (1.8)                       | <0.001  |
| <p>*Flare status reported by patient<br/> HAQ-DI=Health Assessment Questionnaire-Disease Index; PsAID12=Psoriatic Arthritis Impact of Disease 12-item questionnaire; SD=standard deviation;<br/> WPAI=Work Productivity and Activity Impairment questionnaire<br/> Patients were compared, using parametric or non-parametric tests as appropriate (ANOVA for numeric variables, Kruskal-Wallis test for ordinal variables,<br/> Chi2 test for categorical variables.<br/> Values in bold are significant at p&lt;0.05</p> |                    |                                                            |                                                                     |                                 |         |
